# Supplementary material for: Characterization and investigation of Bio-inspired ZnO nanoparticles using Prosopis juliflora and Cordia dichotoma for antioxidant and antibacterial applications
Source: Research Square preprint supplement (doi:10.21203/rs.3.rs-6006311/v1), 2025-03-03
Supplement: Supplementary file 1 [file 0b0a8f844d627a75114273fa.pdf]

## **ELECTRONIC SUPPLEMENTARY MATERIAL**

**Characterization and investigation of Bio-inspired ZnO nanoparticles using *Prosopis juliflora* and *Cordia dichotoma* for antioxidant and antibacterial applications**

**R. Subbiah<sup>a,\*</sup>, S. Anitha<sup>b</sup>, R. Premila<sup>b</sup>**

<sup>a</sup> Department of Basic Engineering, Government Polytechnic College, Sethurapatti, Srirangam, Tiruchirappalli-620012, Tamilnadu, India

<sup>b</sup> Department of Physics, Arulmigu Palaniandavar College of Arts and Culture, Palani- 624601, Tamilnadu, India

-----  
\* Corresponding author. Tel.: +91 0431 2906668  
E-mail address: r\_subbi@rediffmail.com (R. Subbiah)  
Orcid ID: 0000-0002-2688-1833

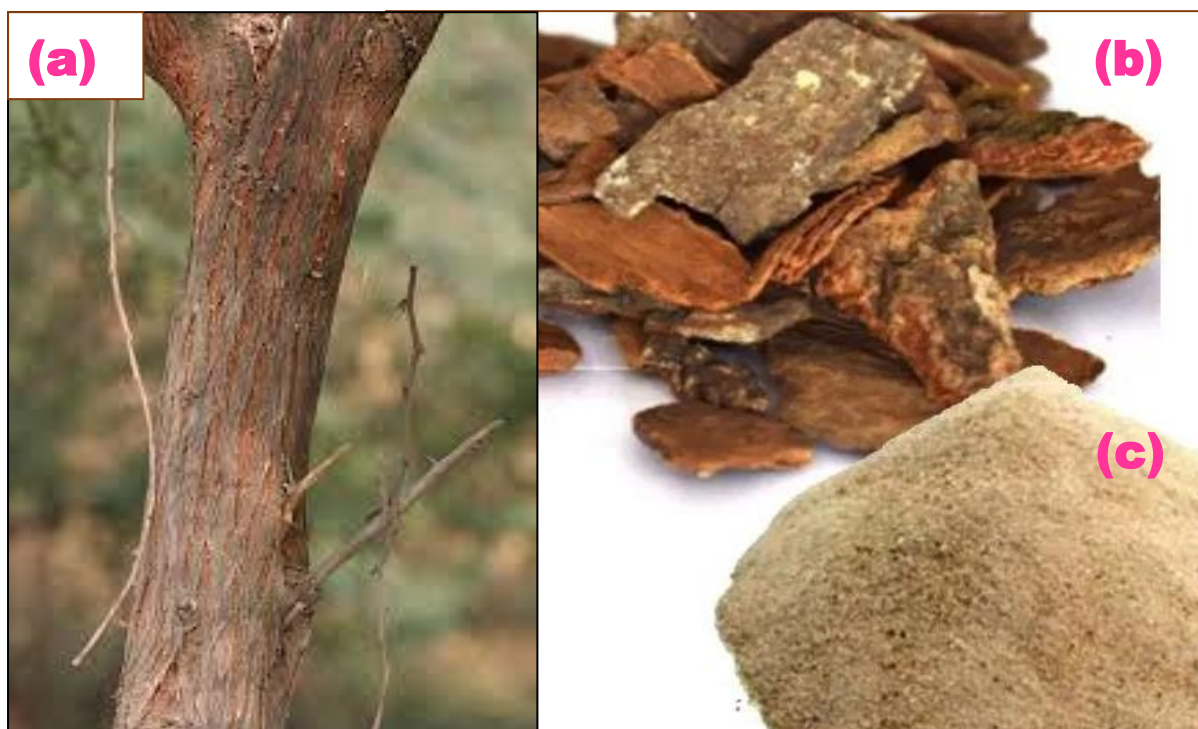

**Fig. S1 *Prosopis juliflora* (a) Tree, (b) Bark and (c) Bark powder**

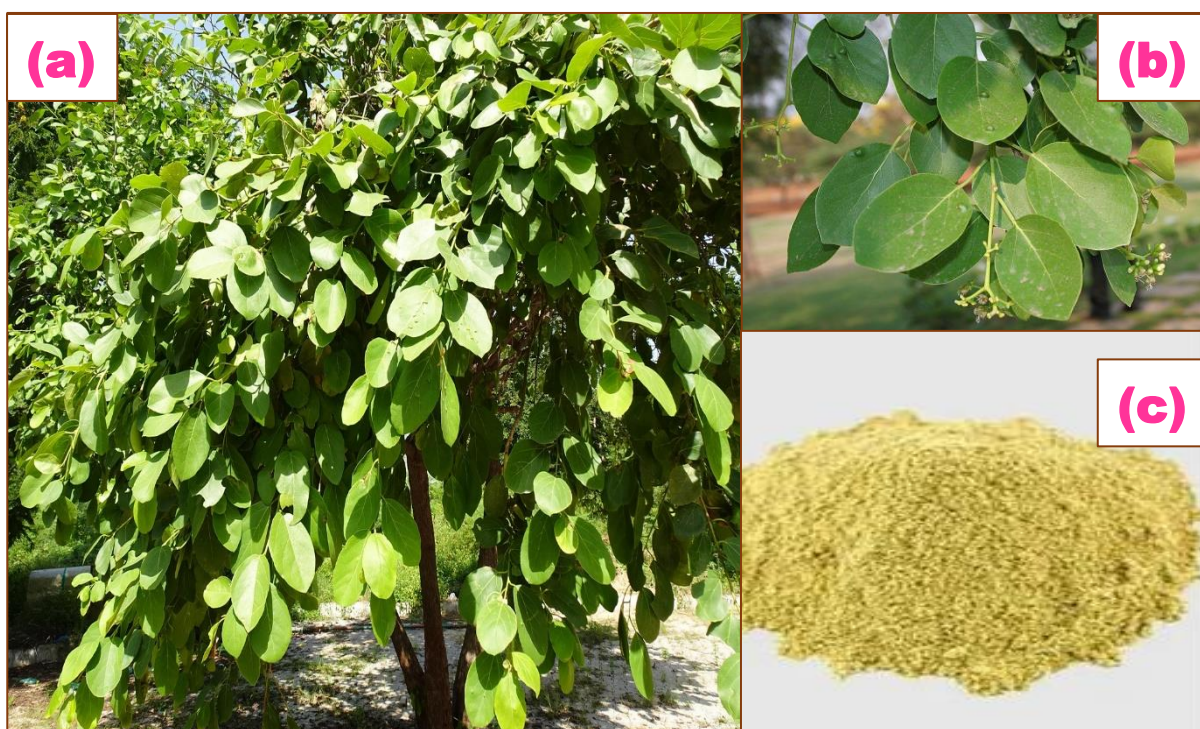

**Fig. S2 *Cordia dichotoma* (a) Tree, (b) Leaves and (c) Leaf powder**

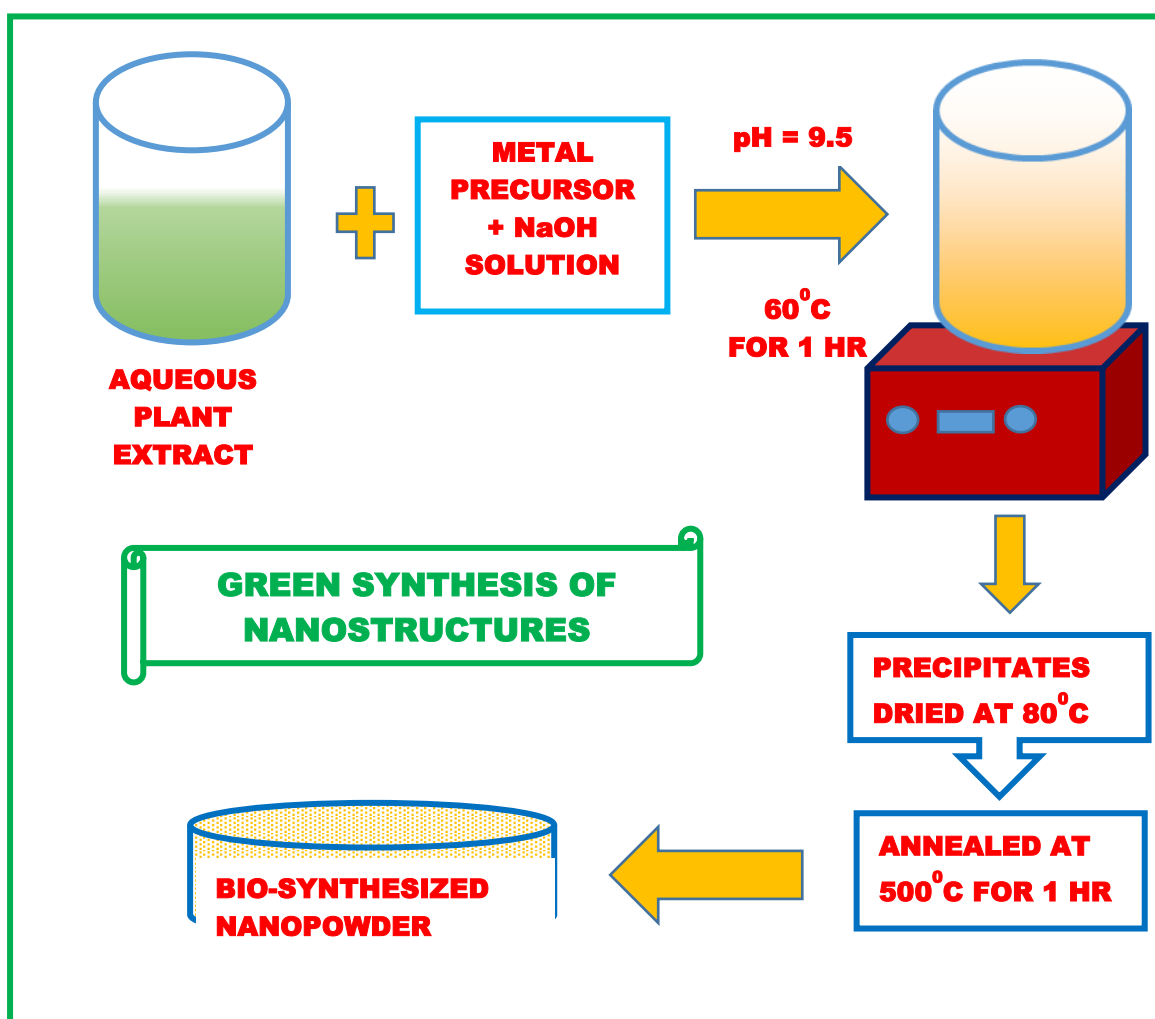

Fig. S3 Bio-reduction Method

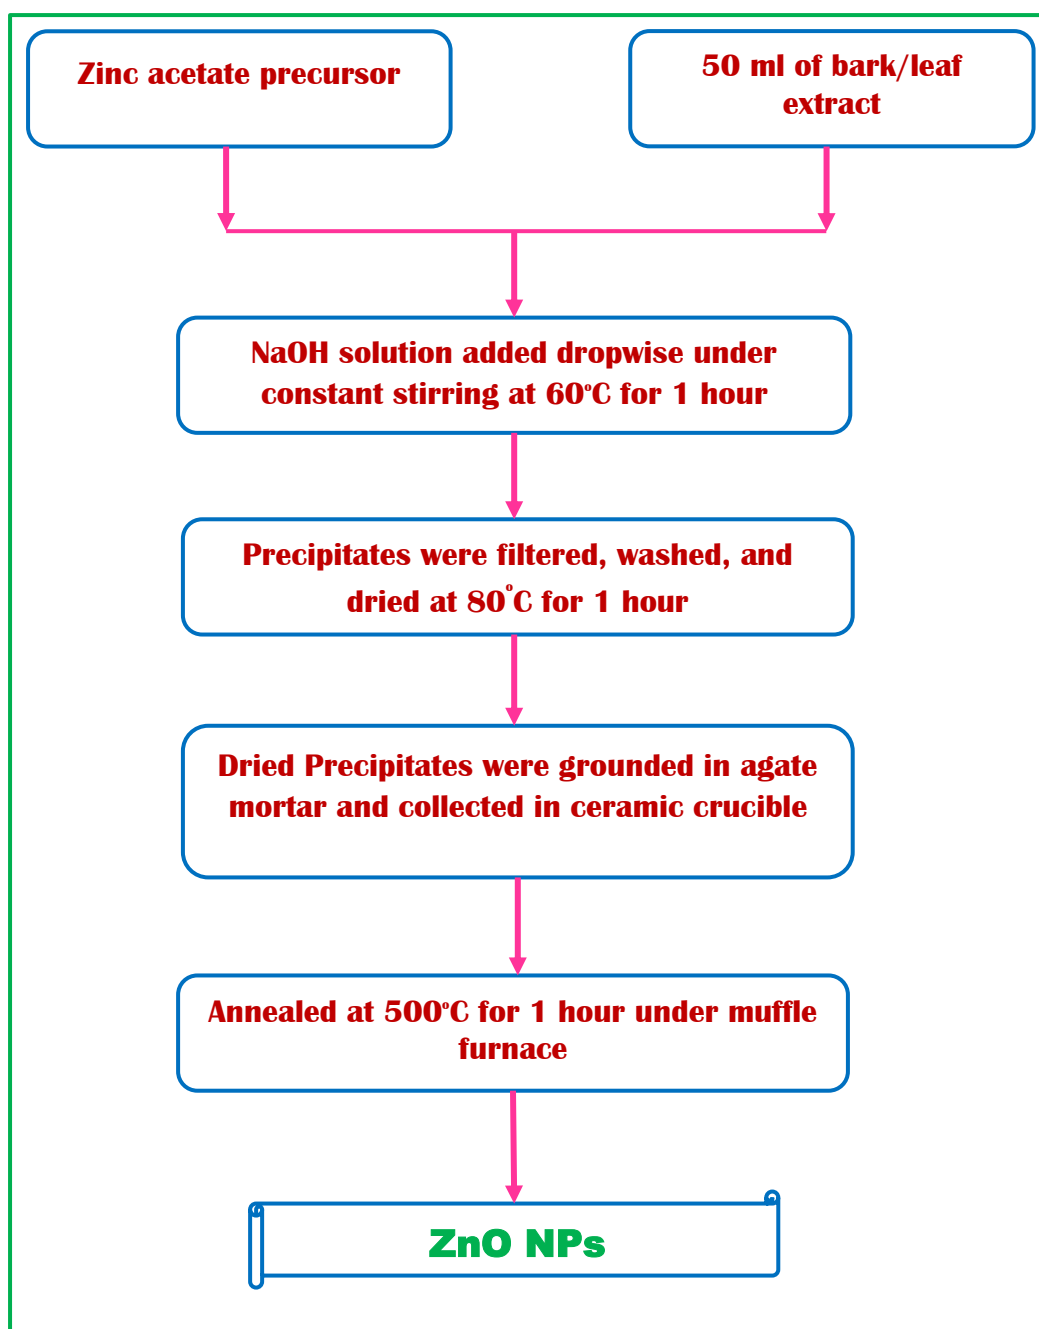

**Fig. S4 Flow chart of Bio-synthesis of zinc oxide nanoparticles**

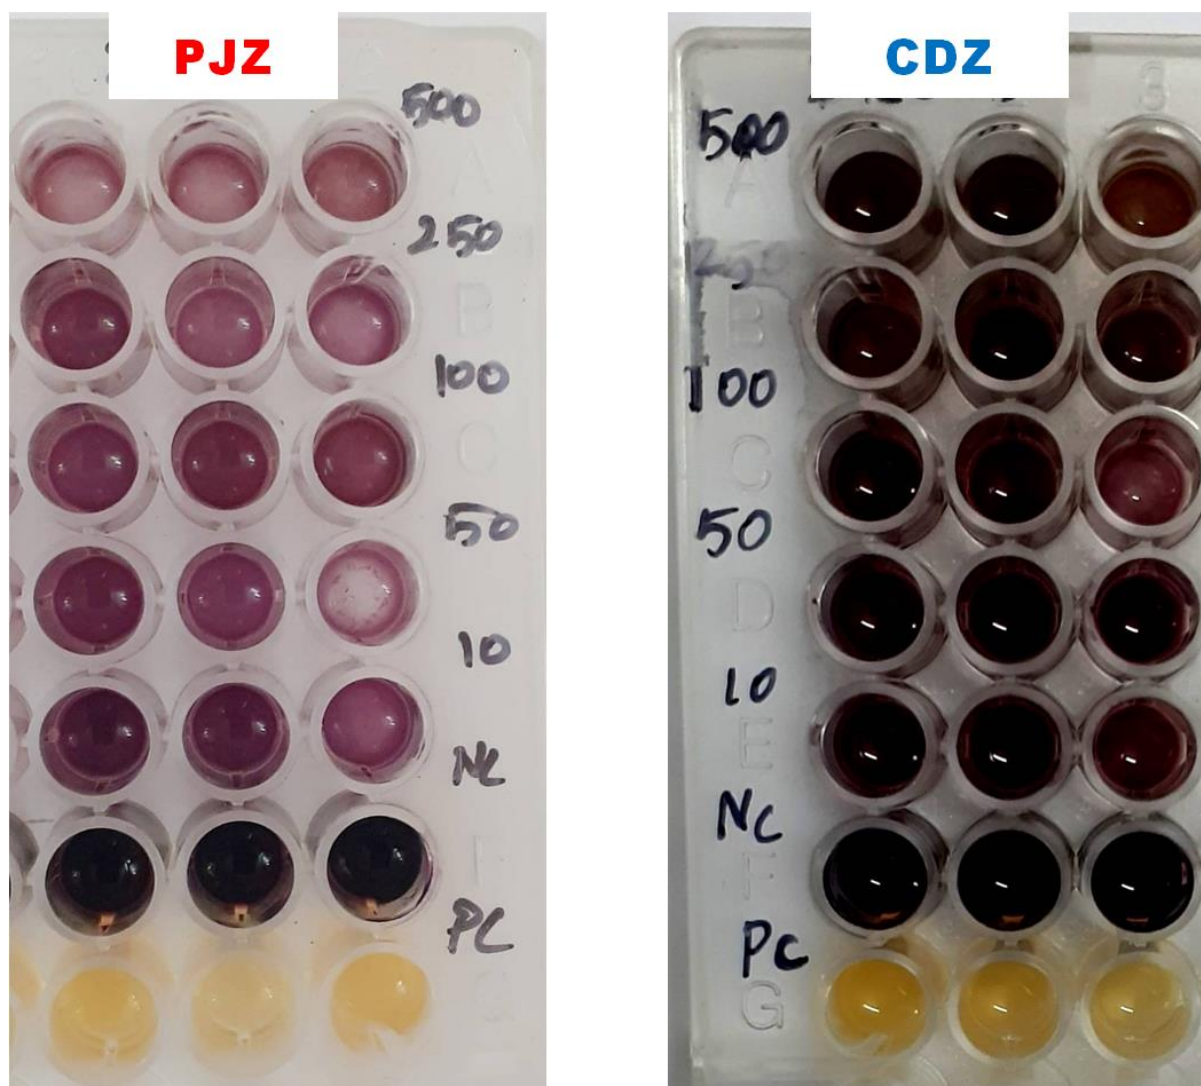

**Fig. S5 Antioxidant activity against DPPH free radical by the green synthesized nanomaterials PJZ and CDZ in different concentrations**
